# Supplementary material for: Controllable copper deficiency in Cu2−xSe nanocrystals with tunable localized surface plasmon resonance and enhanced chemiluminescence
Source: Royal Society of Chemistry journal article supplement (doi:10.1039/c4nr02294g), 2014-01-01
Supplement: c4nr02294g1.pdf [file c4nr02294g1.pdf]

Electronic Supplementary Information (ESI)

for

# Controllable copper deficiency in $\text{Cu}_{2-x}\text{Se}$ nanocrystals with tuning localized surface plasmon resonance and enhancing chemiluminescence †

Shao Qing Lie<sup>a</sup>, Dong Mei Wang<sup>\*a</sup>, Ming Xuan Gao<sup>a</sup>, and Cheng Zhi Huang<sup>\*ab</sup>

<sup>a</sup> Key Laboratory of Luminescence and Real-Time Analytical Chemistry (Southwest University),  
Ministry of Education, College of Chemistry and Chemical Engineering, Southwest University,  
Chongqing, 400715, P. R. China.

<sup>b</sup> College of Pharmaceutical Sciences, Southwest University, Chongqing, 400715, P. R. China.

\*Corresponding author: [wangdm@swu.edu.cn](mailto:wangdm@swu.edu.cn), and [chengzhi@swu.edu.cn](mailto:chengzhi@swu.edu.cn)

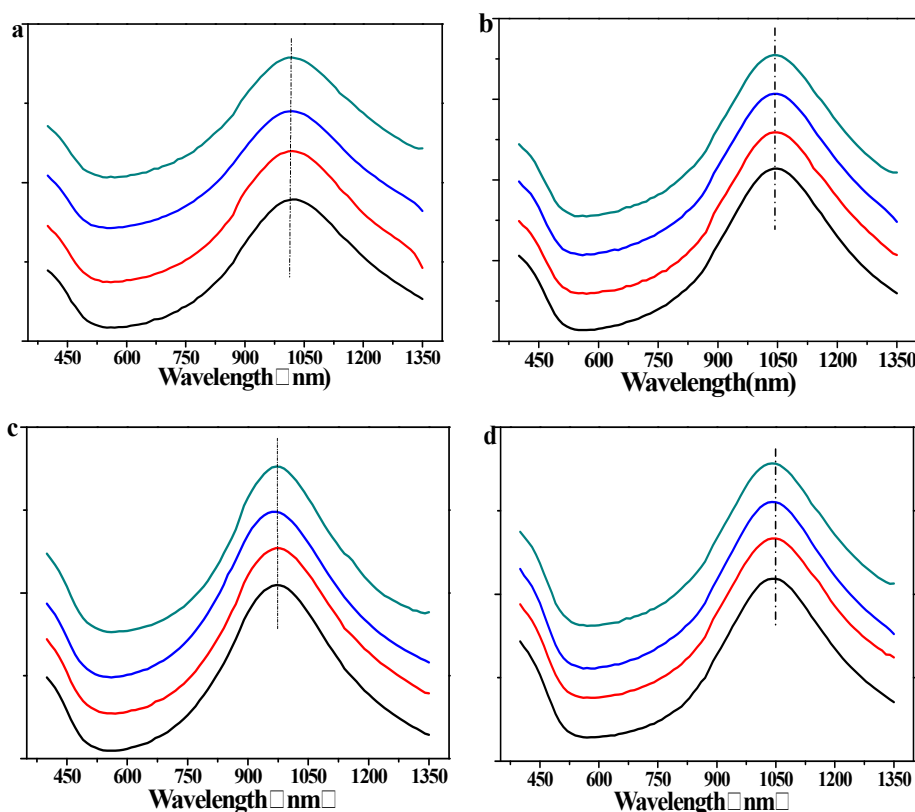

Fig. S1 The stability of  $\text{Cu}_{2-x}\text{Se}$  NCs by monitoring the absorption change every 7 days within a month when stored in 4 °C refrigerator. (a)  $\text{Cu}_{2-x}\text{Se}$  NCs stabilized by CTAB, (b)  $\text{Cu}_{2-x}\text{Se}$  NCs stabilized by SDS, (c)  $\text{Cu}_{2-x}\text{Se}$  NCs stabilized by PSS, (d)  $\text{Cu}_{2-x}\text{Se}$  NCs stabilized by PVP.

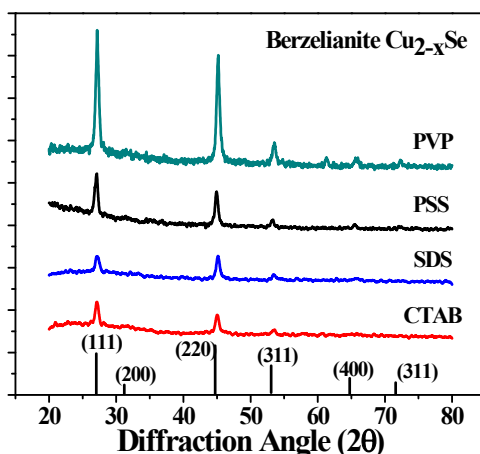

**Fig. S2** X-ray diffraction patterns of crystalline  $\text{Cu}_{2-x}\text{Se}$  NCs. XRD of the nanostructures prepared in the presence of surfactants confirmed that the as-prepared  $\text{Cu}_{2-x}\text{Se}$  are generally cubic berzelianite phase. ( $\text{Cu}_{2-x}\text{Se}$ , PDF card 06-0680)

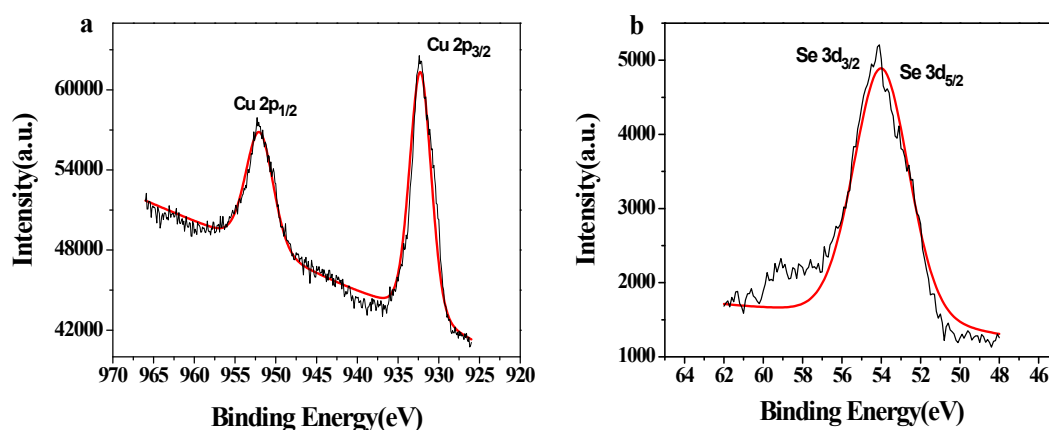

**Fig. S3** X-ray photoelectron spectroscopy of  $\text{Cu}_{2-x}\text{Se}$  NCs. (a) The binding energy of Cu 2p. (b) The binding energy of Se 3d.

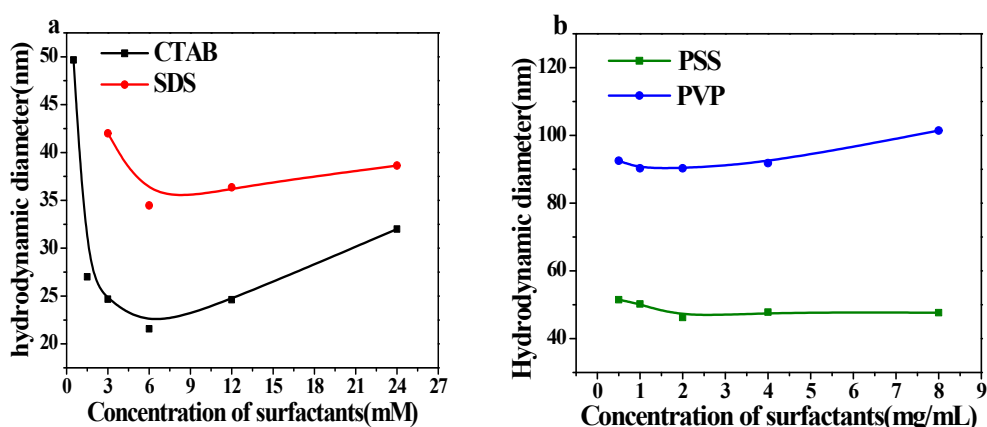

**Fig. S4** The hydrodynamic diameter of nanocrystalline  $\text{Cu}_{2-x}\text{Se}$  NCs. With changing the concentration of surfactants, the hydrodynamic diameter of  $\text{Cu}_{2-x}\text{Se}$  NCs depended on the surfactants.

**Table. S1** The comparison of the physical parameters. In presence of CTAB, SDS, PSS and PVP with different physical properties, the hydrodynamic diameter of Se NCs, Cu<sub>2</sub>Se NCs and Cu<sub>2-x</sub>Se NCs were different.

| surfactant    | Molecular weight | electric charge | Hydrodynamic diameter of Se NCs | Hydrodynamic diameter of Cu <sub>2</sub> Se NCs | Hydrodynamic diameter of Cu <sub>2-x</sub> Se NCs |
|---------------|------------------|-----------------|---------------------------------|-------------------------------------------------|---------------------------------------------------|
| CTAB (6 mM)   | 364.45           | +57.9 mV        | 29.18 nm                        | 22.56 nm                                        | 22.18 nm                                          |
| SDS (6 mM)    | 288.38           | -38.9 mV        | 32.8 nm                         | 36.6 nm                                         | 35.8 nm                                           |
| PSS (2 mg/ml) | 70000            | -55.9 mV        | 44.28 nm                        | 47.73 nm                                        | 45.72 nm                                          |
| PVP (2 mg/ml) | 55000            | +7.7 mV         | 88.26 nm                        | 83.07 nm                                        | 82.33 nm                                          |

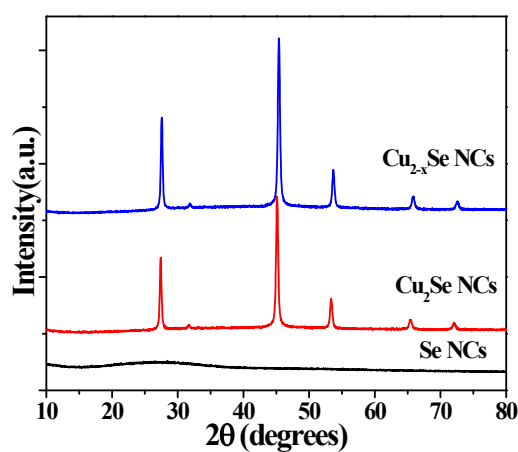

**Fig. S5** X-ray diffraction patterns of Se NCs, Cu<sub>2-x</sub>Se NCs and Cu<sub>2-x</sub>Se NCs. XRD of the nanostructures prepared in the presence of PSS and the diffraction patterns illustrated a significant shift of diffraction peaks during the conversion from Cu<sub>2-x</sub>Se NCs to Cu<sub>2-x</sub>Se NCs.

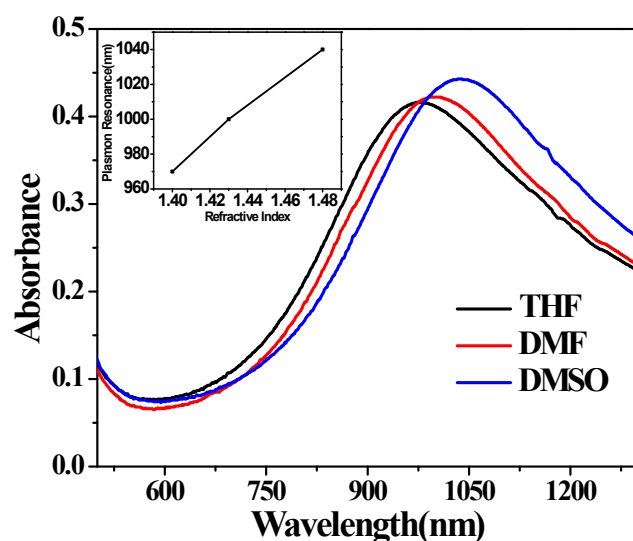

**Fig. S6** Localized surface plasmon resonances in absorbance spectra of  $\text{Cu}_{2-x}\text{SeNCs}$  capped by PSS.  $\text{Cu}_{2-x}\text{Se}$  NCs dispersed in three different solvents with different refractive index: tetrahydrofuran (THF, 1.4), dimethylformamide (DMF, 1.43) and dimethyl sulfoxide (DMSO, 1.48). The inset showed the dependence of LSPR frequency upon solvent refractive index.

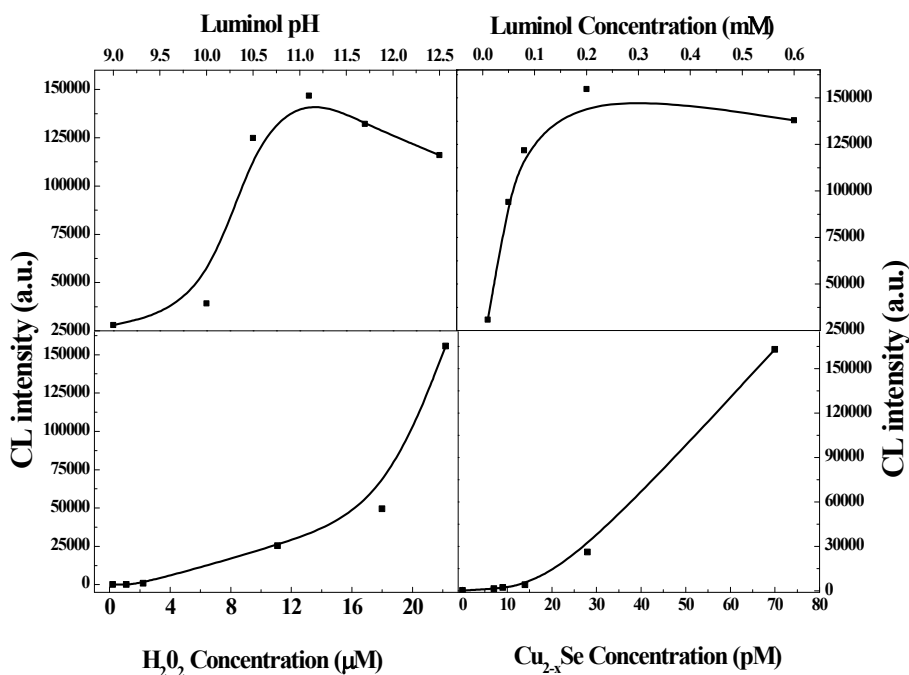

**Fig. S7** Effects of the reactant conditions on luminol- $\text{H}_2\text{O}_2$  CL system in the presence of PSS- $\text{Cu}_{2-x}\text{Se}$ . (a) Effect of luminol pH:  $2.0 \times 10^{-4}$  M luminol,  $22.2 \mu\text{M}$   $\text{H}_2\text{O}_2$ ,  $70.0$  pM PSS- $\text{Cu}_{2-x}\text{Se}$ . (b) Effect of luminol concentration: NaOH medium (pH 11.1),  $22.2 \mu\text{M}$   $\text{H}_2\text{O}_2$ ,  $70.0$  pM PSS- $\text{Cu}_{2-x}\text{Se}$ . (c) Effect of  $\text{H}_2\text{O}_2$  concentration:  $2.0 \times 10^{-4}$  M luminol in NaOH medium (pH 11.1),  $70.0$  pM PSS- $\text{Cu}_{2-x}\text{Se}$ . (d) Effect of PSS- $\text{Cu}_{2-x}\text{Se}$  concentration:  $2.0 \times 10^{-4}$  M luminol in NaOH medium (pH 11.1),  $22.2 \mu\text{M}$   $\text{H}_2\text{O}_2$ .

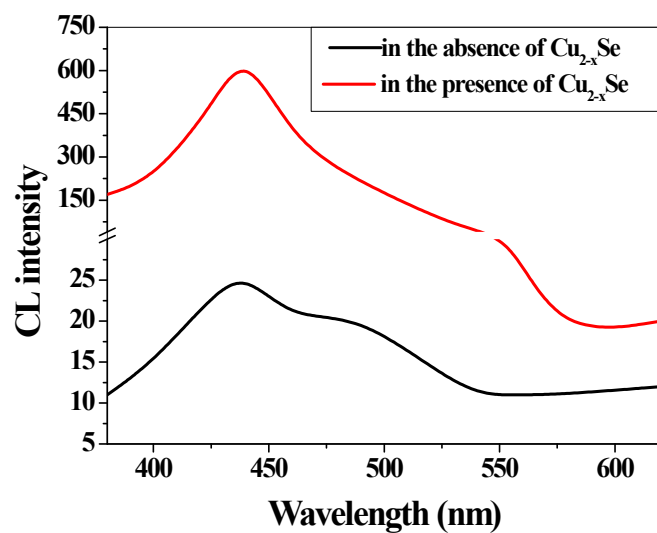

**Fig. S8** Chemiluminescent spectra of (a) luminol-H<sub>2</sub>O<sub>2</sub>-PSS-Cu<sub>2-x</sub>Se, and (b) luminol-H<sub>2</sub>O<sub>2</sub>. Final concentrations: luminol,  $2.0 \times 10^{-4}$  M; H<sub>2</sub>O<sub>2</sub>, 22.2  $\mu$ M; PSS-Cu<sub>2-x</sub>Se, 70.0 pM.

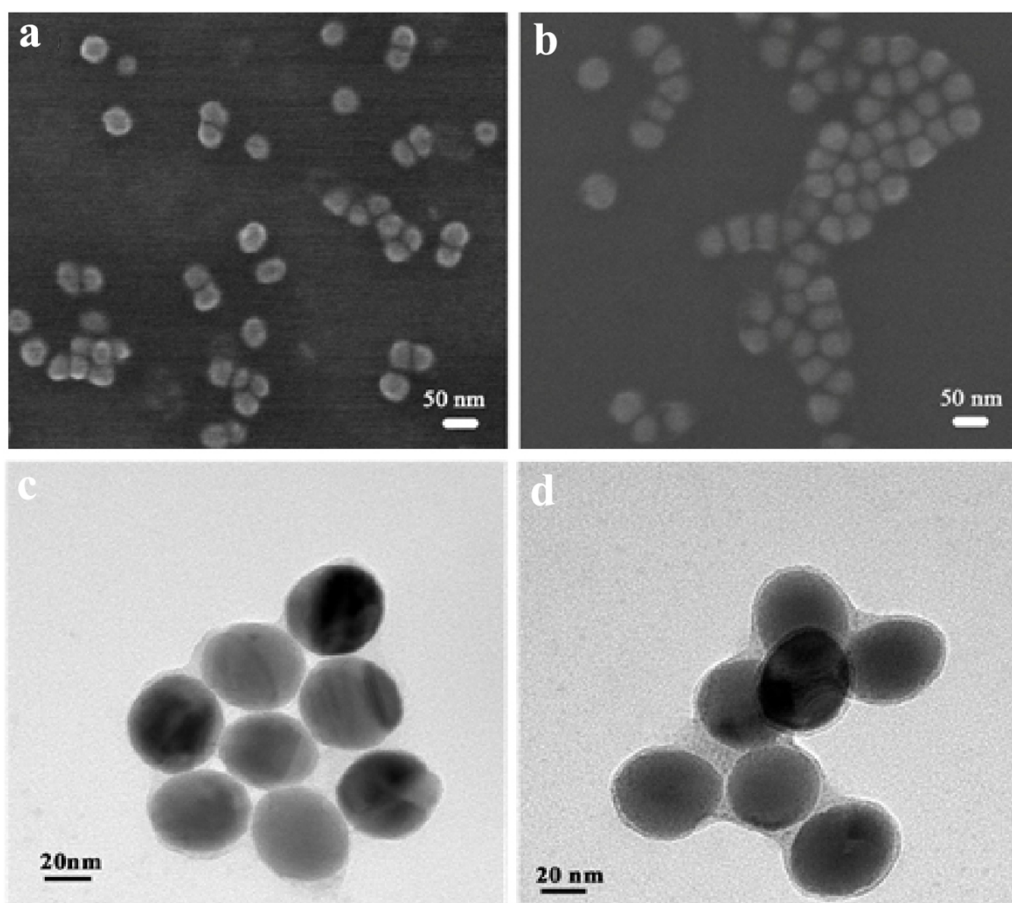

**Fig. S9** SEM and TEM images of PSS-Cu<sub>2-x</sub>Se before (a), (c) and after (b), (d) the CL reaction.

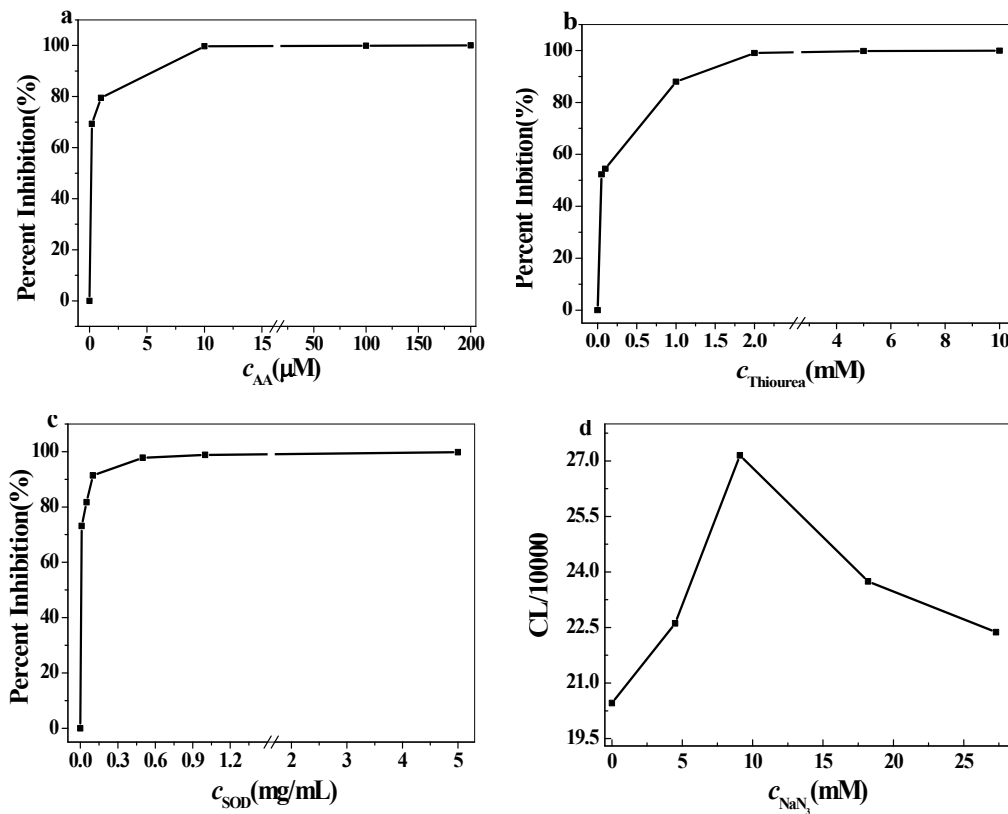

**Fig. S10** Effects of the different radical scavengers of (a) AA, (b) thiourea, (c) SOD, and (d) NaN<sub>3</sub> on the CL intensity of luminol-H<sub>2</sub>O<sub>2</sub>-PSS-Cu<sub>2-x</sub>Se system. Final concentrations: luminol,  $2.0 \times 10^{-4}$  M; H<sub>2</sub>O<sub>2</sub>, 22.2  $\mu$ M; PSS-Cu<sub>2-x</sub>Se, 70.0 pM.

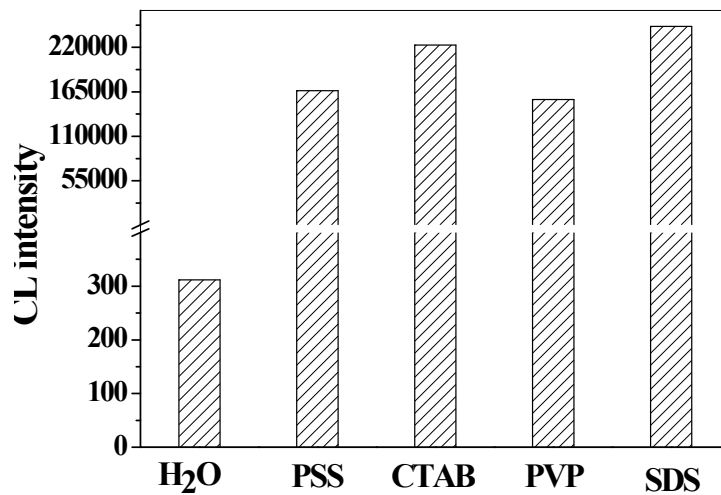

**Fig. S11** Comparison of catalytic activity of different surfactant coated Cu<sub>2-x</sub>Se NCs. Final concentrations: luminol,  $2.0 \times 10^{-4}$  M; H<sub>2</sub>O<sub>2</sub>, 22.2  $\mu$ M; Cu<sub>2-x</sub>Se, 70.0 pM.

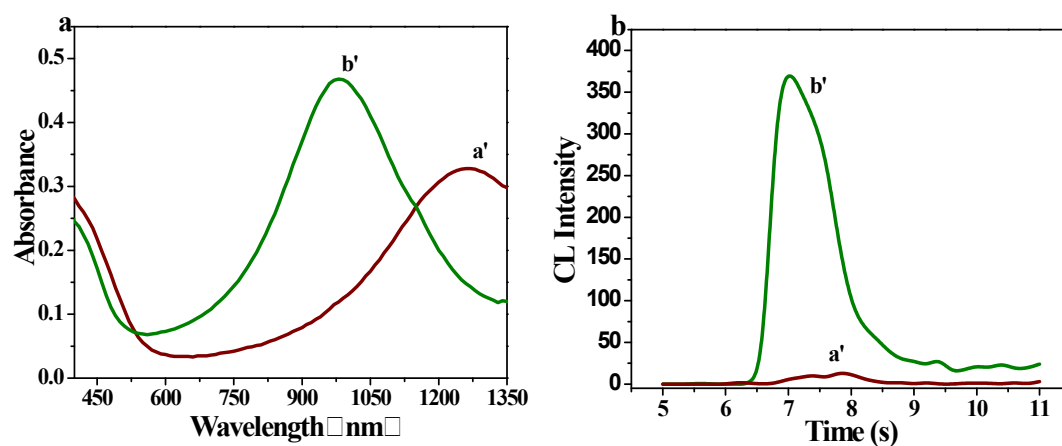

**Fig. S12** Comparison of catalytic activity of PSS-Cu<sub>2-x</sub>Se NCs with different copper deficiency. (a) The absorption spectra of Cu<sub>2-x</sub>Se NCs with  $x \sim 0$  (a') and Cu<sub>2-x</sub>Se NCs with  $x > 0$  (b'). (b) Kinetic monitoring on luminol-H<sub>2</sub>O<sub>2</sub> CL in the presence of a' and b', respectively. Conditions: luminol,  $2.0 \times 10^{-4}$  M; H<sub>2</sub>O<sub>2</sub>,  $1 \times 10^{-4}$  M. The as-prepared PSS-Cu<sub>2-x</sub>Se NCs had been subjected to centrifugation to remove the residual Cu<sup>2+</sup> or PSS species but without dialysis.
